# Supplementary material for: Reparation of an Inflamed Air-Liquid Interface Cultured A549 Cells with Nebulized Nanocurcumin
Source: Pharmaceutics. 2021 Aug 25;13(9):1331. doi: 10.3390/pharmaceutics13091331 (PMC8466083; doi:10.3390/pharmaceutics13091331)
Supplement: Supplementary file 1 [file pharmaceutics-13-01331-s001.zip › pharmaceutics-1326782-supplementary.pdf]

# Supplementary Materials: Reparation of an Inflamed Air–Liquid Interface Cultured A549 Cells with Nebulized Nanocurcumin

Maria Julia Altube, Lilen Ivonne Caimi, Cristian Huck-Iriart, Maria Jose Morilla and Eder Lilia Romero

## S1. Curcumin quantification

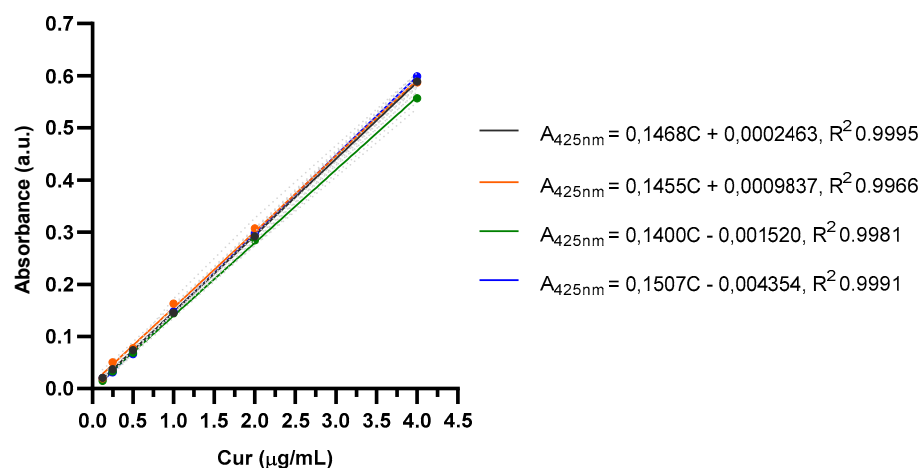

**Figure S1.** Standard curves of curcumin dissolved in methanol. Curves were made different days.

## S2. Curcumin chemical structure

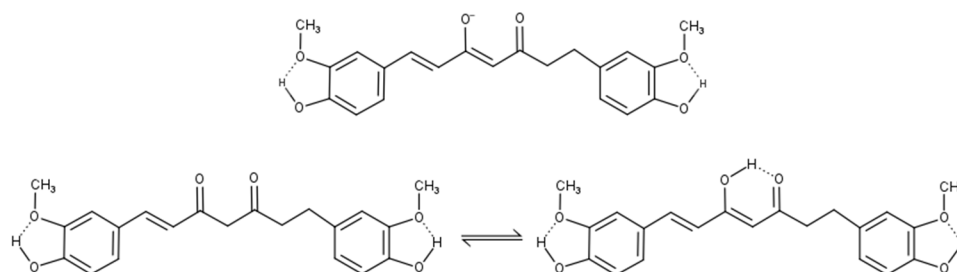

**Figure S2.** Chemical structure and tautomeric forms of Curcumin [40].

## S3. Curcumin suspensions

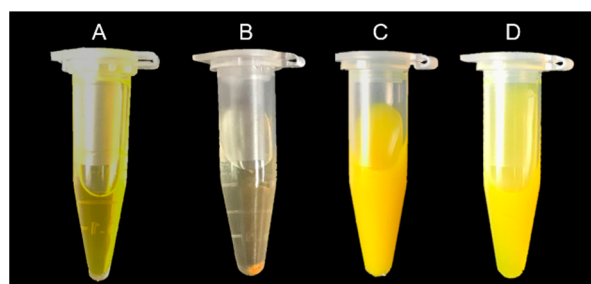

**Figure S3.** 200 µg/mL Cur suspensions in (a) methanol, (b) Tris buffer NaCl pH 7.4, (c) nATC 356 and (d) nLTC.

#### S4. SAXS model

SAXS intensity were analyzed according to the following equation

$$I(q) = S_c[w \cdot P_s + (1 - w)P_m] + back(q) \quad (S1)$$

Where the scattered intensity “ $I(q)$ ” with the weighted contribution of the scattering curve of the uni ( $P_s$ ) and multilamellar structures ( $P_m$ ) [31], respectively, and the background function is determined by:

$$back(q) = k_1 + \frac{k_2}{q^\alpha} \quad (S2)$$

Here,  $S_c$  and  $k_1$ ,  $k_2$  and  $w$  are escalar and  $\alpha$  is an exponential law for low angles contribution. The form factors for the uni and multilamellar contributions are described in the equation S3

$$P_s = 2\pi q^{-2}P_{inf}(q); P_m = 2\pi q^{-2}P_{inf}(q)S(q) \quad (S3)$$

Where  $P_{inf}(q)$  is the infinite form factor of a bilayer structure composed by the polar head and the hydrophobic tail of the surfactant. The form factor is modelled in the following equation

$$P_{inf} = 4q^{-2}\{\Delta\rho_{CH_3}\sin(qR_{CH_3}) + \Delta\rho_{-CH_2-}\{\sin(q[R_{CH_3} + R_{-CH_2-}]) - \sin(qR_{CH_3})\} + \Delta\rho_{head}\{\sin(q[R_{CH_3} + R_{-CH_2-} + R_{head}]) - \sin(q[R_{CH_3} + R_{-CH_2-}])\}\}^2 \quad (S4)$$

where  $\Delta\rho_{CH_3} = \rho_{CH_3} - \rho_{solution}$ ;  $\Delta\rho_{head} = \rho_{head} - \rho_{solution}$  and  $\Delta\rho_{-CH_2-} = \rho_{-CH_2-} - \rho_{solution}$ . The lipid bilayer thickness in this model is  $2(R_{head} + R_{-CH_2-} + R_{CH_3})$ . During the fitting procedure, some of these parameters were allowed to vary within a narrow range:  $R_{CH_3}$  ( $1.5 \text{ \AA} < R_{CH_3} < 3.5 \text{ \AA}$ ),  $\rho_{CH_3}$  ( $0.15 \text{ e/\AA}^3 < \rho_{CH_3} < 0.20 \text{ e/\AA}^3$ ) and  $\rho_{-CH_2-}$  ( $0.25 \text{ e/\AA}^3 < \rho_{-CH_2-} < 0.30 \text{ e/\AA}^3$ ), in accordance with data from the literature [31,33,34]. The other  $P_{inf}(q)$  parameters could vary in a corresponding broader range. For the multilamellar vesicles (MLV) the Modified Caillé Theory (MCT)[31,32] was used to calculate  $S(q)$  in equation S3. This model considers the bending of the membrane and the fluctuations in the space between bilayers by a statistical approach. For that, a disorder parameter is added  $\eta_{Caillé}$  to the equation, that can be written as [33,34]:

$$S(q) = N + 2 \sum_{n=1}^{N-1} (N - n) \cos(nqd) \exp(-0.5772\eta_{Caillé}x) (\pi n)^{-\eta x} \quad (S5)$$

Where  $x = (qd/2\pi)^2$ . Here  $N$  is the number of the stacked bilayers,  $d$  is the repetition distance. Finally, the parameter  $w$  does not represent the real proportion between uni and multilamellar structures. Thus, the invariant  $Q$  [34] is employed instead (equation S6) where  $\chi_s(\%)$  is the percentage of unilamellar structures in the system.

$$\chi_s(\%) = 100 \cdot \frac{w \int_0^\infty q^2 P_s(q) dq}{\int_0^\infty q^2 (w P_s(q) + [1 - w] P_m(q)) dq} \quad (S6)$$

Models were implemented in Python 3.8 scripting using the LMfit library [35] for non-linear least square procedures.

**Table S1.** SAXS’ model parameters obtained from nonlinear least squares procedure.

| Sample       | AT  | ATC | LT              | LTC               |
|--------------|-----|-----|-----------------|-------------------|
| w            | 1   | 1   | $0.87 \pm 0.02$ | $0.958 \pm 0.002$ |
| $\chi_s(\%)$ | 100 | 100 | $32 \pm 1$      | $13 \pm 1$        |

|                                   |                   |                   |                   |                   |
|-----------------------------------|-------------------|-------------------|-------------------|-------------------|
| $R_{CH3}$ (nm)                    | $0.150 \pm 0.003$ | $0.150 \pm 0.001$ | $0.150 \pm 0.001$ | $0.153 \pm 0.001$ |
| $R_{CH2}$ (nm)                    | $0.79 \pm 0.09$   | $0.79 \pm 0.09$   | $1.05 \pm 0.01$   | $1.03 \pm 0.08$   |
| $R_{head}$ (nm)                   | $1.75 \pm 0.06$   | $0.170 \pm 0.06$  | $1.93 \pm 0.05$   | $1.86 \pm 0.09$   |
| Thickness (nm)                    | $5.3 \pm 0.1$     | $5.3 \pm 0.1$     | $6.3 \pm 0.1$     | $6.1 \pm 0.1$     |
| $\rho_{head}$ (e/Å <sup>3</sup> ) | $0.42 \pm 0.01$   | $0.41 \pm 0.01$   | $0.40 \pm 0.01$   | $0.40 \pm 0.02$   |
| $\rho_{CH2}$ (e/Å <sup>3</sup> )  | $0.23 \pm 0.01$   | $0.25 \pm 0.02$   | $0.25 \pm 0.01$   | $0.25 \pm 0.03$   |
| $\rho_{CH3}$ (e/Å <sup>3</sup> )  | $0.17 \pm 0.01$   | $0.20 \pm 0.01$   | $0.15 \pm 0.01$   | $0.15 \pm 0.01$   |
| N                                 | --                | --                | $2.19 \pm 0.06$   | $6.35 \pm 0.05$   |
| d (nm)                            | --                | --                | $10.75 \pm 0.04$  | $10.77 \pm 0.01$  |
| $\eta_{Caille}$                   | --                | --                | $0.009 \pm 0.001$ | $0.009 \pm 0.001$ |

### S5. Nanovesicles stability upon storage

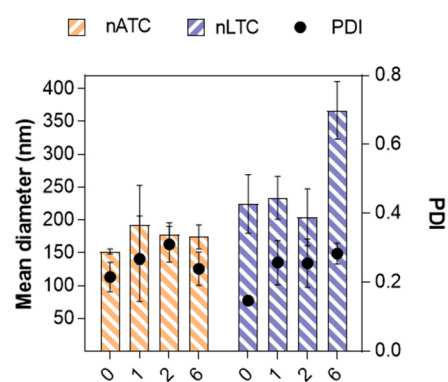

Figure S4. Stability upon storage by 1, 2 and 6 months at 4 °C of nATC and nLTC.

### S6. Nanovesicles stability upon nebulization

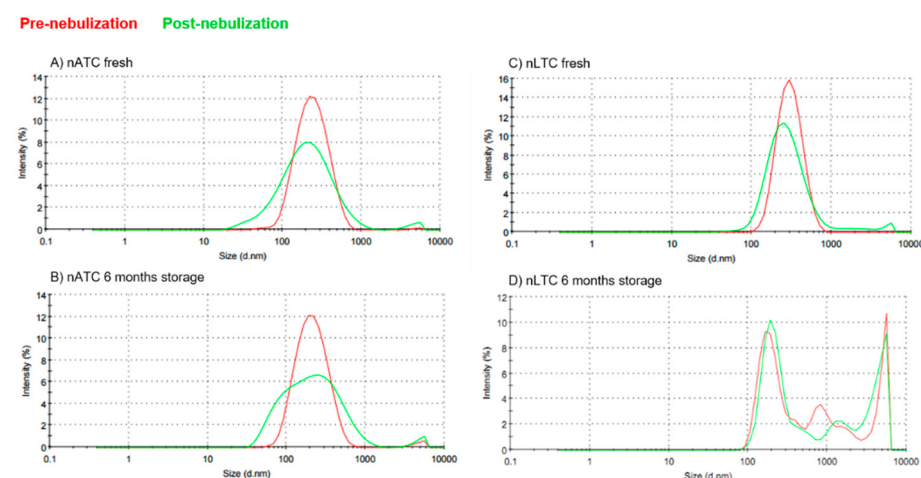

Figure S5. Changes in mean size during nebulization of a) nATC fresh, c) nLTC fresh or after 6 months incubation b) nATC and d) nLTC.

### S7. Cytotoxicity of CUR-nanovesicles

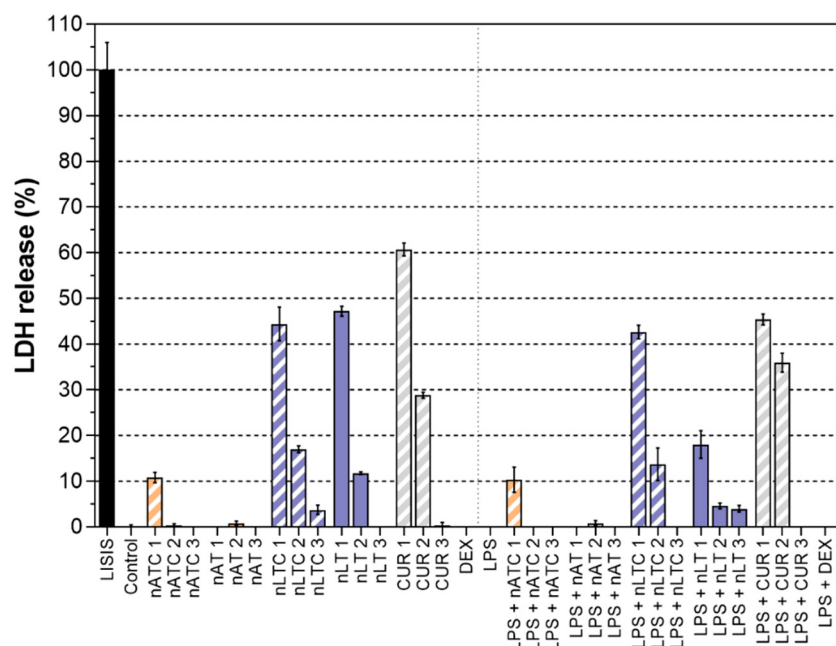

**Figure S6.** LDH release after 24 h incubation of free CUR and CUR loaded nanovesicles on THP-1 cells 1) CUR 20 µg/mL – total lipids 1.4 mg/mL, 2) CUR 10 µg/mL – total lipids 0.7 mg/mL, 3) CUR 5 µg/mL – total lipids 0.35 mg/mL.

### References:

- [30] M.J. Altube, M.M.B. Martínez, B. Malheiros, P.C. Maffia, L.R.S. Barbosa, M.J. Morilla, E.L. Romero, Fast Biofilm Penetration and Anti-PAO1 Activity of Nebulized Azithromycin in Nanoarchaeosomes, *Mol. Pharm.* 2020, 17. <https://doi.org/10.1021/acs.molpharmaceut.9b00721>.
- [31] R.M. Fernandez, K.A. Riske, L.Q. Amaral, R. Itri, M.T. Lamy, Influence of salt on the structure of DMPG studied by SAXS and optical microscopy, *Biochim. Biophys. Acta BBA - Biomembr.* 2008, 1778. <https://doi.org/10.1016/j.bbamem.2007.12.005>.
- [32] R. Zhang, S. Tristram-Nagle, W. Sun, R.L. Headrick, T.C. Irving, R.M. Suter, J.F. Nagle, Small-angle x-ray scattering from lipid bilayers is well described by modified Caillé theory but not by paracrystalline theory, *Biophys. J.* 1996, 70. [https://doi.org/10.1016/S0006-3495\(96\)79576-0](https://doi.org/10.1016/S0006-3495(96)79576-0).
- [33] R. Zhang, R.M. Suter, J.F. Nagle, Theory of the structure factor of lipid bilayers, *Phys. Rev. E.* 1994, 50. <https://doi.org/10.1103/PhysRevE.50.5047>.
- [34] A.F. Craievich, Small-Angle X-ray Scattering by Nanostructured Materials, in: L. Klein, M. Aparicio, A. Jitianu (Eds.), *Handb. Sol-Gel Sci. Technol.*, Springer International Publishing, Switzerland Cham, 2016. [https://doi.org/10.1007/978-3-319-19454-7\\_37-1](https://doi.org/10.1007/978-3-319-19454-7_37-1).
- [35] M. Newville, T. Stensitzki, D.B. Allen, A. Ingargiola, LMFIT: Non-Linear Least-Square Minimization and Curve-Fitting for Python, Zenodo, 2014. <https://doi.org/10.5281/ZENODO.11813>. Available online: [https://cars9.uchicago.edu/software/python/lmfit\\_MinimizerResult/](https://cars9.uchicago.edu/software/python/lmfit_MinimizerResult/) (accessed on 15 July 2021).
- [40] Jagannathan, R.; Abraham, P.M.; Poddar, P. Temperature-Dependent Spectroscopic Evidences of Curcumin in Aqueous Medium: A Mechanistic Study of Its Solubility and Stability. *The Journal of Physical Chemistry B* 2012, 116, doi:10.1021/jp3050516.
